# Supplementary material for: Synergistic Effect of Bolus Exposure to Zinc Oxide Nanoparticles on Bleomycin-Induced Secretion of Pro-Fibrotic Cytokines without Lasting Fibrotic Changes in Murine Lungs
Source: MDPI journal article supplement (doi:10.3390/ijms16010660), 2014-12-30
Supplement: s1 [file s1]

## Supplementary Information

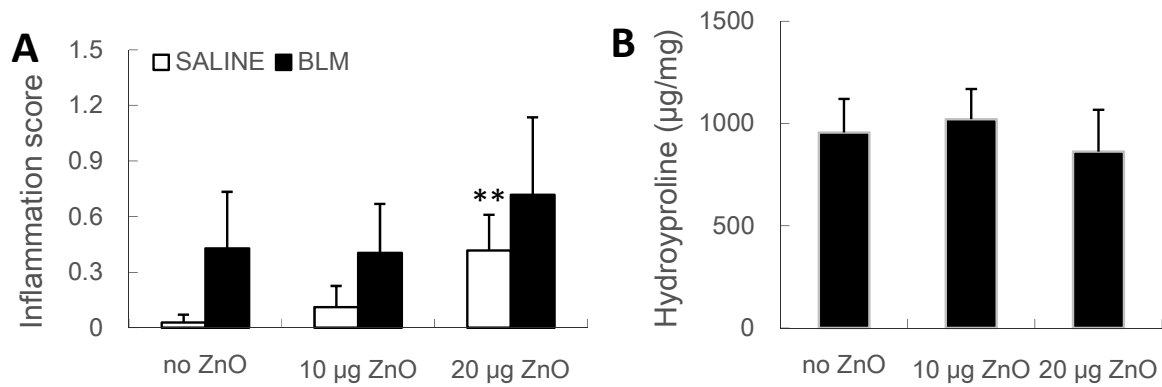

**Figure S1.** (A) Results of histological scoring for total lung inflammation and (B) The hydroxyproline content in lung tissue of BLM-treated mice. Mice were exposed to ZnO nanoparticles with or without BLM treatment and sacrificed at day 14 after administration. Total lung inflammation was defined using H&E staining of lung tissue.  $n = 6-7$ . Data are mean  $\pm$  SD; \*\*  $p < 0.01$ ; compared to vehicle control.

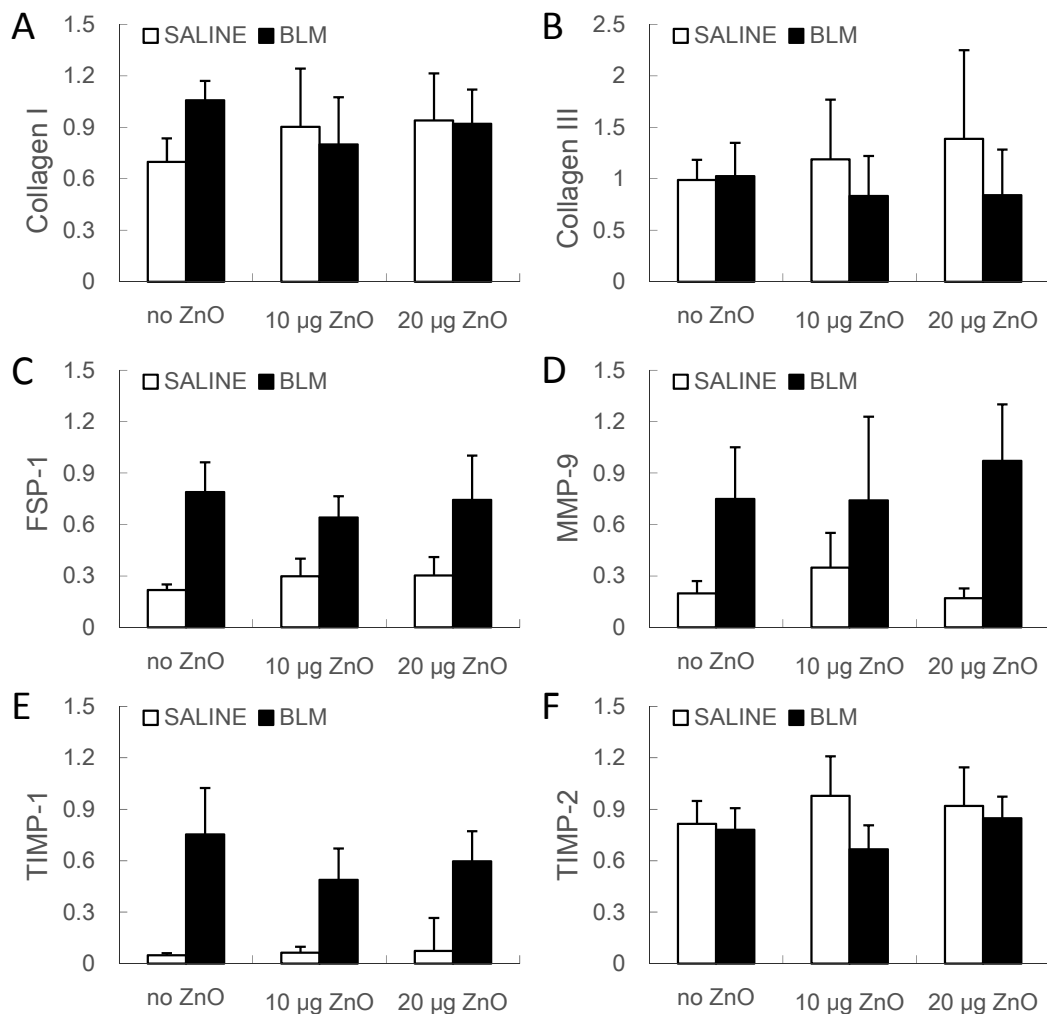

**Figure S2.** The mRNA expression levels in lung tissue 14 days after administration. (A) collagen I; (B) collagen III; (C) FSP-1; (D) MMP-9; (E) TIMP-1 and (F) TIMP-2. Mice were exposed to ZnO nanoparticles with or without BLM treatment.  $n = 6-7$ . Data are mean  $\pm$  SD.
